# Supplementary material for: ECMO during the COVID-19 pandemic: moving from rescue therapy to more reasonable indications
Source: PubMed Central journal article supplement — Eur Respir J. 2022 Feb 10;59(2):2103262. doi: 10.1183/13993003.03262-2021 (PMC8828992; doi:10.1183/13993003.03262-2021), 2022-02-10

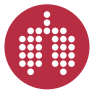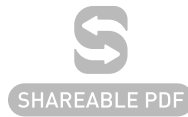

# ECMO during the COVID-19 pandemic: moving from rescue therapy to more reasonable indications

Christian Karagiannidis<sup>1,2</sup>, Thomas Bein<sup>3</sup> and Tobias Welte <sup>4</sup>

<sup>1</sup>ARDS and ECMO Centre Cologne-Merheim, Cologne, Germany. <sup>2</sup>Lunge Centre, University Witten/Herdecke, Witten, Germany. <sup>3</sup>Faculty of Medicine, University of Regensburg, Regensburg, Germany. <sup>4</sup>Dept of Respiratory Medicine, Hannover Medical School, Hannover, Germany.

Christian Karagiannidis (Christian.Karagiannidis@uni-wh.de)

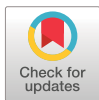

Shareable abstract (@ERSpublications)

Shedding new light on ECMO treatment in ARDS: moving from rescue therapy to a standardised treatment option with defined indications <https://bit.ly/3zXAhyF>

**Cite this article as:** Karagiannidis C, Bein T, Welte T. ECMO during the COVID-19 pandemic: moving from rescue therapy to more reasonable indications. *Eur Respir J* 2022; 59: 2103262 [DOI: 10.1183/13993003.03262-2021].

This single-page version can be shared freely online.

Copyright ©The authors 2022

This version is distributed under the terms of the Creative Commons Attribution Non-Commercial Licence 4.0. For commercial reproduction rights and permissions contact [permissions@ersnet.org](mailto:permissions@ersnet.org)

Received: 28 Dec 2021  
Accepted: 3 Jan 2022

Coronavirus disease 2019 (COVID-19) led to an unprecedented number of patients on mechanical ventilation, many of them presenting with severe acute respiratory distress syndrome (ARDS) [1–4]. Depending on the resources of national healthcare systems, extracorporeal membrane oxygenation (ECMO) was frequently applied during the pandemic [3, 5–7]. While intensive care unit experience improved with this new disease, various forms of drug therapies were introduced in living guidelines, resulting in a dynamic development in outcome of COVID-19 [8, 9]. Particularly noteworthy was the introduction of dexamethasone in the summer of 2020, and in 2021 the additional administration of tocilizumab in the early severe phase of the disease [10]. A third important factor that had a significant impact on the outcome of severe respiratory failure was the start of vaccination programmes, primarily for risk groups, depending on national strategies, followed by the general public.

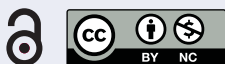

Supplement: ERJ-03262-2021.Shareable.pdf [file ERJ-03262-2021.Shareable.pdf]
